# Supplementary material for: Shared Decision Making with Acutely Hospitalized, Older Poly-Medicated Patients: A Mixed-Methods Study in an Emergency Department
Source: MDPI journal article supplement (doi:10.3390/ijerph19116429), 2022-05-25
Supplement: s1 [file s1]

**Table S1.** Checklist of Mixed Methods Elements in a Submission to Advance the Methodology of Mixed Methods Research

|                                                                                                                                                                   |    |                                                                                                                                                                                                                                       |     |    |                                                                  |
|-------------------------------------------------------------------------------------------------------------------------------------------------------------------|----|---------------------------------------------------------------------------------------------------------------------------------------------------------------------------------------------------------------------------------------|-----|----|------------------------------------------------------------------|
| <b>Manuscript title</b><br>" Shared Decision Making with Acutely Hospitalized Older Poly-medicated Patients:<br>A Mixed- method Study in an Emergency Department" |    |                                                                                                                                                                                                                                       | Yes | No | Page number<br>(if not<br>applicable,<br>indicate NA)            |
| <b>Title</b>                                                                                                                                                      |    |                                                                                                                                                                                                                                       |     |    |                                                                  |
|                                                                                                                                                                   | 1  | Does the title directly indicate or sufficiently allude to the methodological contribution of the article?                                                                                                                            | X   |    | Front page                                                       |
| <b>Abstract</b>                                                                                                                                                   |    |                                                                                                                                                                                                                                       |     |    |                                                                  |
|                                                                                                                                                                   | 2  | Does the abstract include an explicit statement about a methodological challenge or issue in the field that will be addressed in the article?                                                                                         | X   |    | Front page                                                       |
|                                                                                                                                                                   | 3  | Does the abstract indicate the methodological/theoretical contribution of the article to the field of mixed methods research?                                                                                                         |     | X  |                                                                  |
| <b>Main text of the article</b>                                                                                                                                   |    |                                                                                                                                                                                                                                       |     |    |                                                                  |
|                                                                                                                                                                   | 4  | Does the article have a clear writing style with sufficient headers and sub- headers such that the reader can readily follow the flow and argumentation?                                                                              | X   |    | NA                                                               |
|                                                                                                                                                                   | 5  | Does the text in the background reiterate and expand upon the methodological challenge or issue as identified in the abstract?                                                                                                        | X   |    | p.2, 3-top                                                       |
|                                                                                                                                                                   | 6  | Does the background contain a rigorous review and citations of relevant and recent mixed methods literature to support examining the methodological aim?                                                                              |     | X  |                                                                  |
|                                                                                                                                                                   | 7  | Does the background include an explicit methodological aim?                                                                                                                                                                           | X   |    | See 2.2. study design p. 3                                       |
|                                                                                                                                                                   | 8  | Does the background contain an explication of the article's structure and methodological points that will be addressed?                                                                                                               | X   |    | See 2.2. study design p. 3                                       |
|                                                                                                                                                                   | 9  | In the body of article, are each of the methodological points identified in #8 addressed persuasively in the order specified?                                                                                                         | X   |    |                                                                  |
|                                                                                                                                                                   | 10 | Does the article include a strategy to convey the overall complexity of the topic or study phenomenon such as a figure or illustration?                                                                                               | X   |    | Figure 1 page 3 + Table 5 (Meta-inferences between datasets) p.9 |
|                                                                                                                                                                   | 11 | In the discussion, are the explicit points made in #8 synthesized together to logically support the overarching methodological aim?                                                                                                   | X   |    | p. 14, 15                                                        |
|                                                                                                                                                                   | 12 | Does the discussion section include a specific subsection "Contribution to the Field of Mixed Methods Research" that reviews the points made and extant literature to articulate the articles novel contribution(s) to mixed methods? |     | X  |                                                                  |
|                                                                                                                                                                   | 13 | Does the article have a discussion of the methodological limitations?                                                                                                                                                                 | X   |    | Page 15<br>Methods<br>strengths and<br>limitations               |
|                                                                                                                                                                   | 14 | Does the discussion section include recommendations for future mixed methods inquiry based on the paper's unique contribution or limitations?                                                                                         |     | X  |                                                                  |
|                                                                                                                                                                   | 15 | Have the references been cited according to the current American Psychological Association style?                                                                                                                                     |     | X  | NA                                                               |
| <b>Additional elements for empirical methodological articles only</b>                                                                                             |    |                                                                                                                                                                                                                                       |     |    |                                                                  |
|                                                                                                                                                                   | 16 | Does the background of the article include explicit statements of both the methodological aim and purpose of the empirical study separately?                                                                                          | X   |    | In objectives p. 3                                               |

|  |    |                                                                                                                                                                                  |   |  |                                           |
|--|----|----------------------------------------------------------------------------------------------------------------------------------------------------------------------------------|---|--|-------------------------------------------|
|  | 17 | Does the description of the methods include sufficient detail about the procedures used and present these in a logical order?                                                    | X |  | In study design p. 3 + p.4-7              |
|  | 18 | Does the submission include a procedural diagram of the data collection and analysis procedures as a figure?                                                                     | X |  | Figure 1 p. 3                             |
|  | 19 | Does the submission include a table, matrix or visual structure, e.g., joint display, to illustrate integration and interpretation of the qualitative and quantitative findings? | X |  | Table 5 p. 9                              |
|  | 20 | Does the discussion articulate how the use of a mixed methods approach advanced a greater understanding of the substantive topic compared to using a monomethod approach?        | X |  | Page 15 Methods strengths and limitations |

*Note.* Adapted from Fetters and Freshwater (2015a) and Fetters and Molina-Azorin (2019).

**Table S2. Themes and sub-themes from the patient interview**

| Theme                                                  | Sub-themes                                                                                                                                                                                                                                                                                                           |
|--------------------------------------------------------|----------------------------------------------------------------------------------------------------------------------------------------------------------------------------------------------------------------------------------------------------------------------------------------------------------------------|
| Sparse communication about medicine in the acute phase | Things were moving a little too quickly<br>Difficult to recall information in the acute phase<br>No need to discuss medication because everything is written down                                                                                                                                                    |
| Talk about side-effects                                | Crucial to discuss side-effects<br>No one enquired about side-effects<br>Active patients want to investigate different alternatives                                                                                                                                                                                  |
| Preferences for deprescribing                          | Most patients prefer to take less medicine<br>Difference in the active and passive patients' behavior                                                                                                                                                                                                                |
| Power disparities prevents dialogue about medicine     | Inquiring is to show vulnerability                                                                                                                                                                                                                                                                                   |
| Patients lack knowledge of their medicine              | Some patients prefer more knowledge about the effect of their new medicine<br>Active patients are skeptical of new medicine, and wants more information why their medication was changed<br>Active patients seeking further information concerning or with respect to their medicine on the internet after discharge |

**Table S3. Analysis example from transcript to theme**

| Interview transcription                                                                                                                                                                                 | Code                                                 | Sub-theme                                                         | Theme                                                                        |
|---------------------------------------------------------------------------------------------------------------------------------------------------------------------------------------------------------|------------------------------------------------------|-------------------------------------------------------------------|------------------------------------------------------------------------------|
| Patient: <i>"No, no one asked about medicine. They have everything in writing, so there is nothing to discuss. They simply glance at their screens to know what you get and don't get"</i> (Pt ID # 2). | No one asked about the patient's medicine in the ED. | No need to discuss medication because everything is written down. | Sparse communication about medicine in the acute phase of an hospitalization |
